# Supplementary material for: Dual tuning of nickel sulfide nanoflake array electrocatalyst through nitrogen doping and carbon coating for efficient and stable water splitting
Source: Royal Society of Chemistry journal article supplement (doi:10.1039/c9cy00688e), 2019-01-01
Supplement: c9cy00688e1.pdf [file c9cy00688e1.pdf]

## Supporting Information

### Dual Tuning of Nickel Sulfide Nanoflake Array Electrocatalyst through Nitrogen Doping and Carbon Coating for Efficient and Stable Water Splitting

Qiuyan Hao,<sup>a</sup> Shiyun Li,<sup>a</sup> Hui Liu,<sup>\*a</sup> Jing Mao,<sup>c,d</sup> Ying Li,<sup>a</sup> Caichi Liu,<sup>a</sup> Jun Zhang,<sup>\*a,b</sup>  
Chengchun Tang<sup>a,b</sup>

<sup>a</sup> School of Material Science and Engineering, Hebei University of Technology, Dingzigu Road 1, Tianjin 300130, P. R. China.

<sup>b</sup> Hebei Key Laboratory of Boron Nitride Micro and Nano Materials, Guangrongdao Road 29, Tianjin 300130, P. R. China.

<sup>c</sup> School of Materials Science and Engineering, Tianjin University, Tianjin Haihe Education Park, Tianjin 300072, PR China

<sup>d</sup> Center for functional materials, Brookhaven National Laboratory, City of New York 11973, USA

**E-mail address:** liuhuihebut@163.com (H. Liu). junnano@gmail.com (J. Zhang)

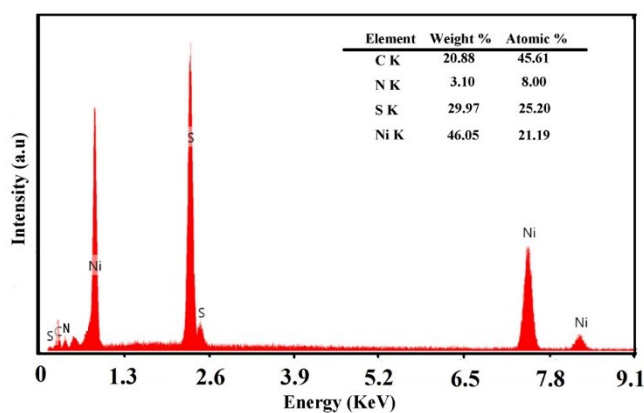

**Figure S1.** The EDS of N-Ni<sub>3</sub>S<sub>2</sub>@C/NF

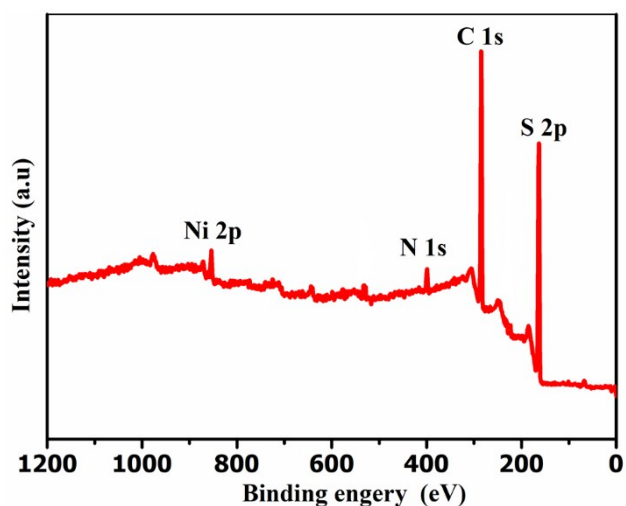

Figure S2. Survey XPS spectra of N-Ni<sub>3</sub>S<sub>2</sub>@C/NF

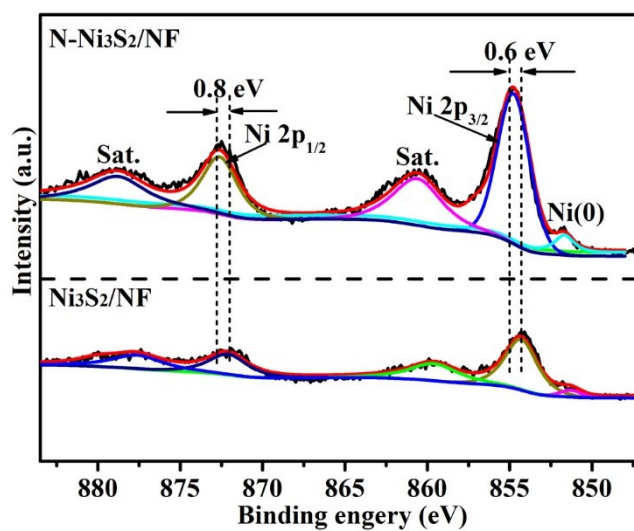

Figure S3. The XPS spectra of Ni 2p for Ni<sub>3</sub>S<sub>2</sub>/NF and N-Ni<sub>3</sub>S<sub>2</sub>/NF

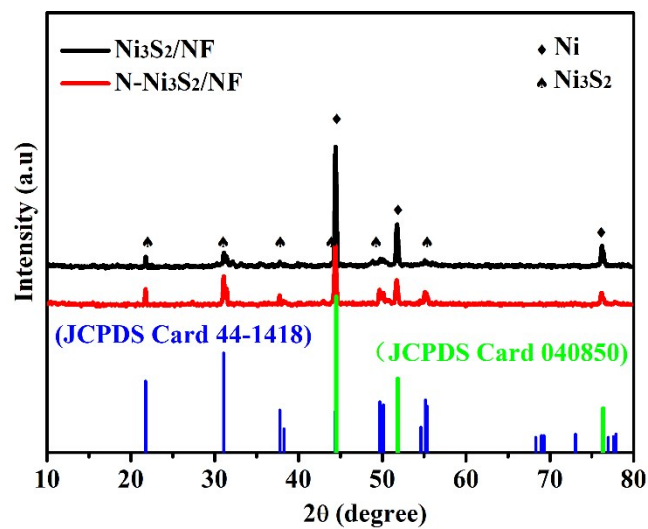

Figure S4. The XRD pattern of Ni<sub>3</sub>S<sub>2</sub>/NF and N-Ni<sub>3</sub>S<sub>2</sub>/NF

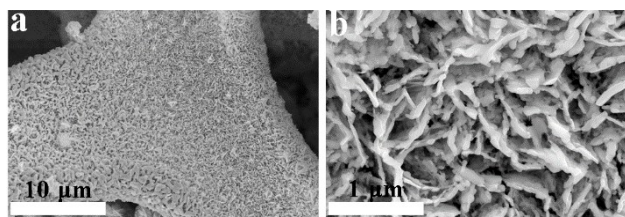

**Figure S5.** The SEM image of  $\text{Ni}_3\text{S}_2/\text{NF}$  with different magnifications

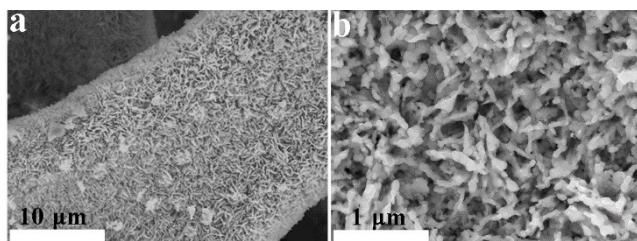

**Figure S6.** The SEM image of  $\text{N-Ni}_3\text{S}_2/\text{NF}$  with different magnifications

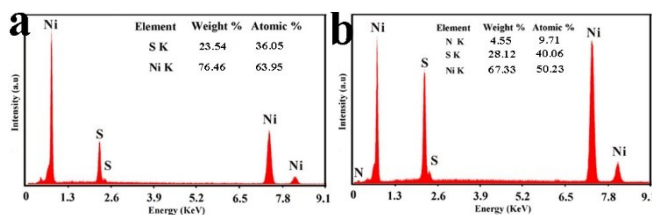

**Figure S7.** a) The EDS of  $\text{Ni}_3\text{S}_2/\text{NF}$  and b)  $\text{N-Ni}_3\text{S}_2/\text{NF}$

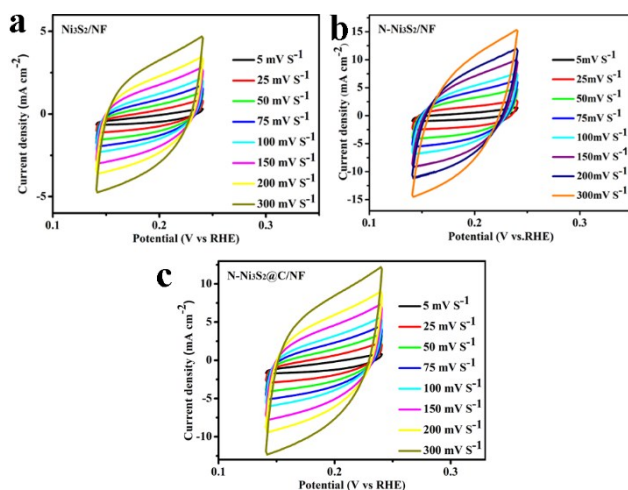

**Figure S8.** a) Typical cyclic voltammetry curves of  $\text{N-Ni}_3\text{S}_2@\text{C}/\text{NF}$ , b)  $\text{N-Ni}_3\text{S}_2/\text{NF}$  and c)  $\text{Ni}_3\text{S}_2/\text{NF}$  in 1M KOH with different scan rates

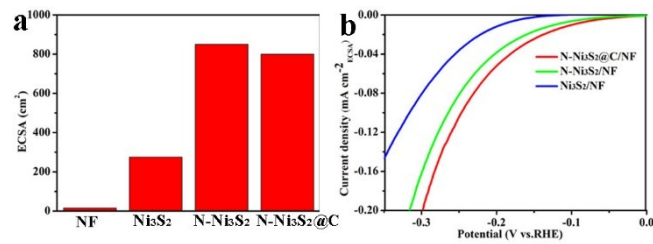

**Figure S9.** a) The ECSA of N-Ni<sub>3</sub>S<sub>2</sub>@C/NF, N-Ni<sub>3</sub>S<sub>2</sub>/NF, Ni<sub>3</sub>S<sub>2</sub>/NF and NF. b) Polarization curves from normalized to the electrochemical active surface area (ECSA) for HER.

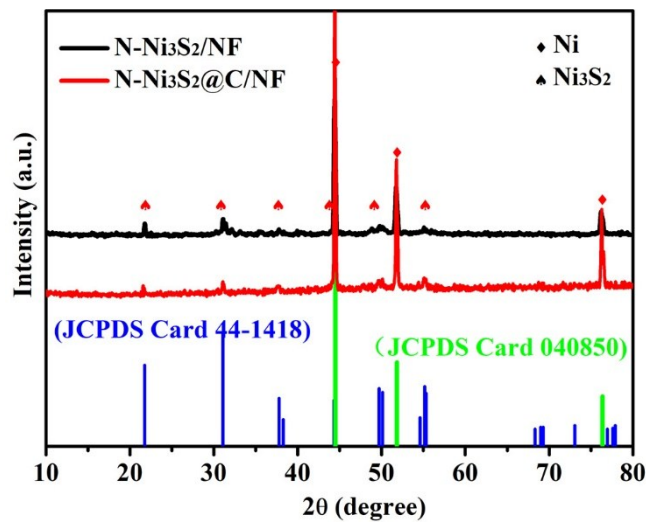

**Figure S10.** The XRD of N-Ni<sub>3</sub>S<sub>2</sub>/NF and N-Ni<sub>3</sub>S<sub>2</sub>@C/NF after HER

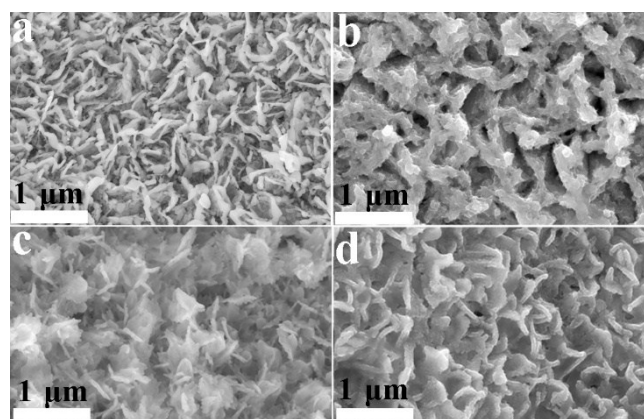

**Figure S11.** SEM images of a-b) N-Ni<sub>3</sub>S<sub>2</sub>/NF and c-d) N-Ni<sub>3</sub>S<sub>2</sub>@C/NF before and after HER in 1 M KOH

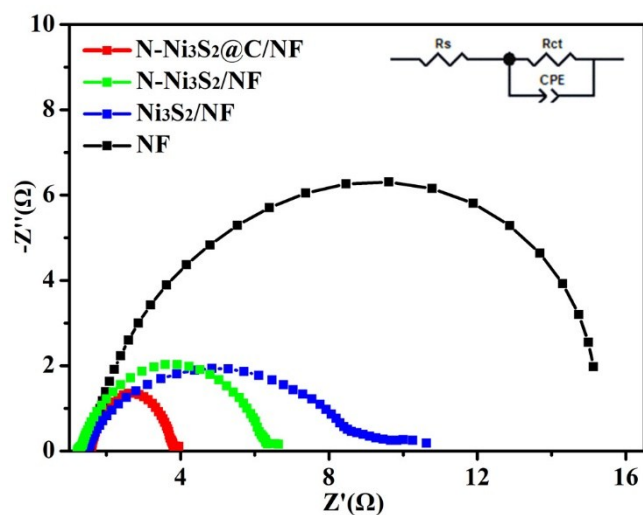

**Figure S12.** Electrochemical impedance spectroscopy (EIS) Nyquist plots at 1.53 V vs. RHE for all the synthesized materials.

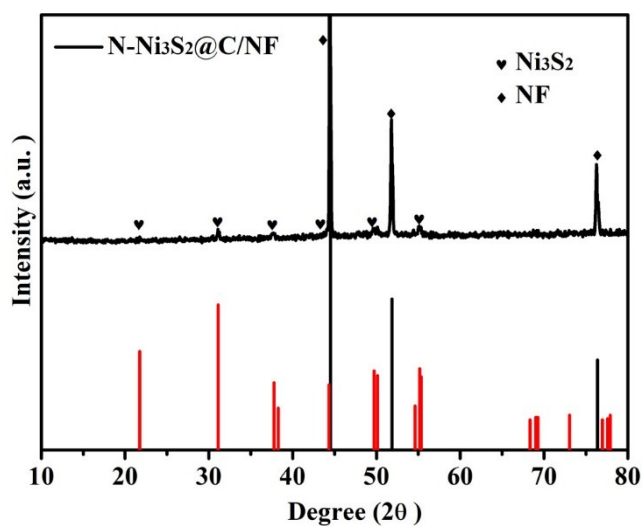

**Figure S13.** The XRD of N-Ni<sub>3</sub>S<sub>2</sub>@C/NF after OER

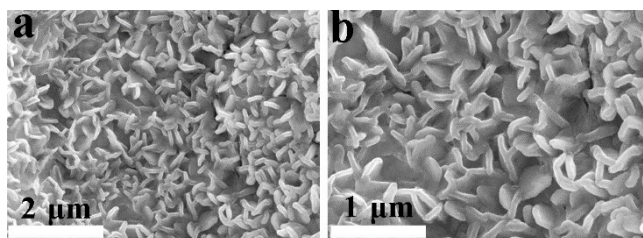

**Figure S14.** a-b) The SEM image of N-Ni<sub>3</sub>S<sub>2</sub>@C/NF after OER in 1 M KOH with different magnifications

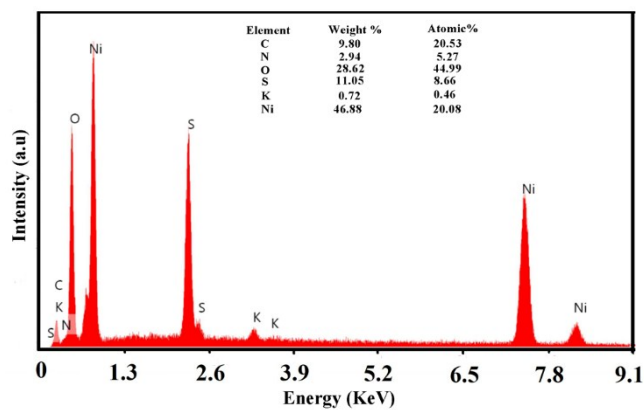

Figure S15. The EDS of N-Ni<sub>3</sub>S<sub>2</sub>@C/NF after OER

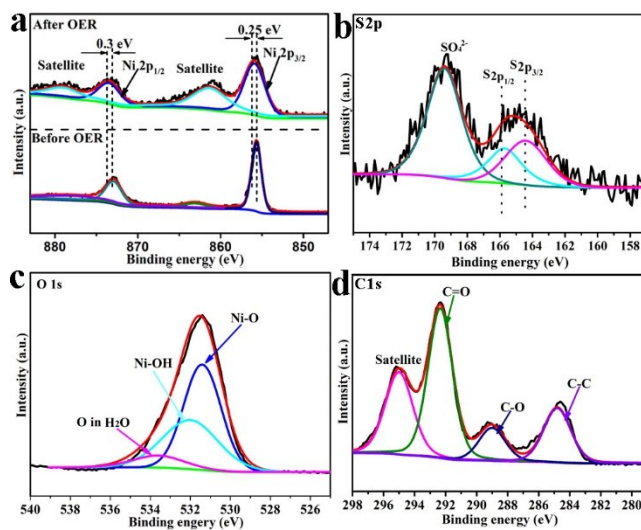

Figure S16. The XPS spectra of a) Ni 2p, b) S 2p, c) O 1s and d) C 1s for N-

Ni<sub>3</sub>S<sub>2</sub>@C/NF after OER

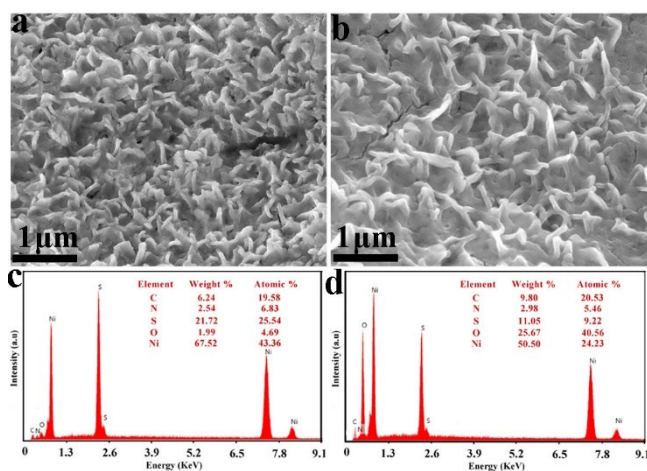

**Figure S17.** SEM images of N-Ni<sub>3</sub>S<sub>2</sub>@C/NF after overall water splitting. a) cathode  
 b) anode and EDS results of N-Ni<sub>3</sub>S<sub>2</sub>@C/NF after overall water splitting. c) cathode  
 d) anode

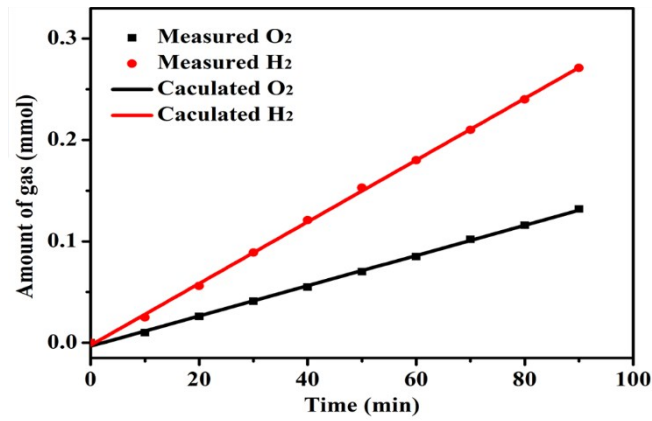

**Figure S18.** The amount of gas theoretically calculated and experimentally measured versus time for overall water splitting.

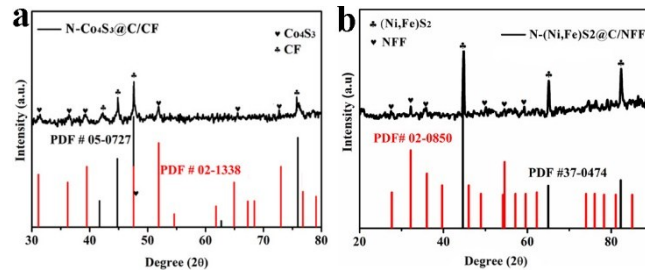

**Figure S19.** The XRD of a) N-Co<sub>4</sub>S<sub>3</sub>@C/CF and b) N-(Ni,Fe)S<sub>2</sub>@C/NFF

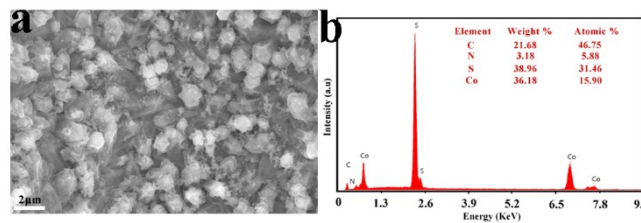

**Figure S20.** a) The SEM image and b) EDS of N-Co<sub>4</sub>S<sub>3</sub>@C/CF

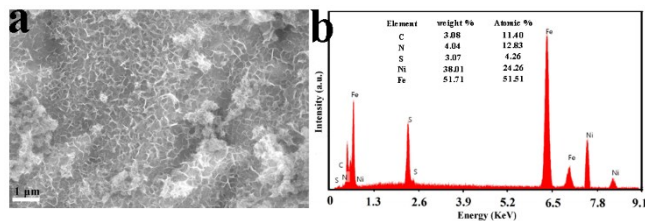

**Figure S21.** a) The SEM image and b) EDS of N-(Ni,Fe)S<sub>2</sub>@C/NFF

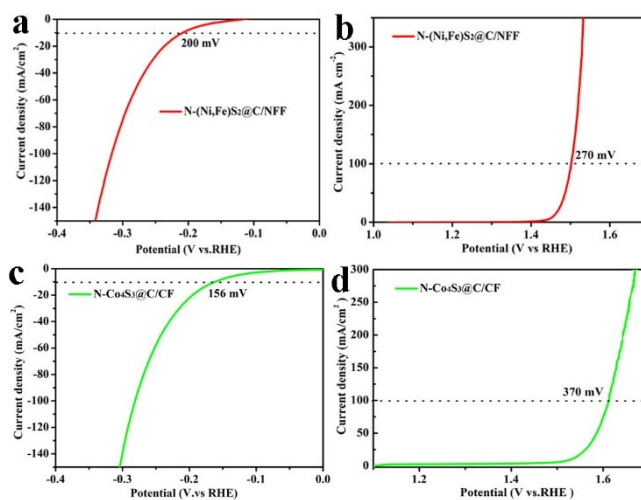

**Figure S22.** a) *iR*-corrected linear sweep voltammetry curves of N-(Ni,Fe)S<sub>2</sub>@C/NFF for HER and b)OER in 1 M KOH.c) *iR*-corrected linear sweep voltammetry curves of N-Co<sub>4</sub>S<sub>3</sub>@C/CF for HER and d)OER in1 M KOH.

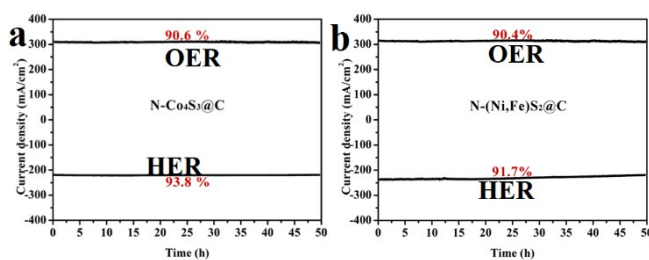

**Figure S23.** a) The *i-t* curves of N-Co<sub>4</sub>S<sub>3</sub>@C, b) N-(Ni,Fe)S<sub>2</sub>@C for HER and OER in 1 M KOH .



**Table S1** Comparison of HER performance of N-Ni<sub>3</sub>S<sub>2</sub>@C/NF product with various well-developed electrocatalysts in the literature.

| Catalyst                                    | Electrolyte | J<br>(mA cm <sup>-2</sup> ) | $\eta$<br>(mV) | Tafel<br>(mV dec <sup>-1</sup> ) | Ref.      |
|---------------------------------------------|-------------|-----------------------------|----------------|----------------------------------|-----------|
| N-Ni <sub>3</sub> S <sub>2</sub> @C/NF      | 1 M KOH     | 10                          | 113            | 90                               | This work |
| N-Ni <sub>3</sub> S <sub>2</sub> /NF        | 1 M KOH     | 10                          | 110            | -                                | 1         |
| Ni <sub>3</sub> S <sub>2</sub> nanorod      | 1 M KOH     | 10                          | 200            | 107                              | 2         |
| Ni <sub>3</sub> S <sub>2</sub> nanosheet    | 1 M KOH     | 10                          | 223            | -                                | 3         |
| NiS microsphere                             | 1 M KOH     | 20                          | 158            | 83                               | 4         |
| Fe <sub>2</sub> Ni <sub>2</sub> N           | 1 M KOH     | 10                          | 110            | -                                | 5         |
| NiCo <sub>2</sub> S <sub>4</sub> nanowire   | 1 M KOH     | 10                          | 210            | 59                               | 6         |
| Ni <sub>3</sub> S <sub>2</sub> needle array | 1 M KOH     | 10                          | 117            | 130                              | 7         |
| NiFe/NiCo <sub>2</sub> O <sub>4</sub> /NF   | 1 M KOH     | 10                          | 105            | 88                               | 8         |
| NiFe@NC                                     | 1 M KOH     | 10                          | 200            | -                                | 9         |
| CoP                                         | 1 M KOH     | 10                          | 209            | 51                               | 10        |
| Co <sub>3</sub> Se <sub>4</sub> /CF         | 1 M KOH     | 10                          | 179            | -                                | 11        |

**Table S2** Comparison of OER performance of N-Ni<sub>3</sub>S<sub>2</sub>@C/NF product with various well-developed electrocatalysts in the literature

| Catalyst                                 | Electrolyte | J<br>(mA cm <sup>-2</sup> ) | $\eta$<br>(mV) | Tafel<br>(mV dec <sup>-1</sup> ) | Ref.      |
|------------------------------------------|-------------|-----------------------------|----------------|----------------------------------|-----------|
| N-Ni <sub>3</sub> S <sub>2</sub> @C/NF   | 1M KOH      | 100                         | 310            | 75                               | This work |
| N-Ni <sub>3</sub> S <sub>2</sub> /NF     | 1M KOH      | 170                         | 350            | 70                               | 1         |
| Ni <sub>3</sub> S <sub>2</sub> nanorod   | 1M KOH      | 100                         | 370            | 140                              | 12        |
| Ni <sub>3</sub> S <sub>2</sub> nanosheet | 1M KOH      | 100                         | 350            | -                                | 3         |
| NiS microsphere                          | 1M KOH      | 50                          | 335            | 120                              | 4         |
| NiFe-LDH                                 | 1M KOH      | 100                         | 300            | 47                               | 13        |
| NiCoFe LDH                               | 1M KOH      | 30                          | 233            | 53                               | 14        |
| NiCo LDH                                 | 1M KOH      | 100                         | 340            | 57                               | 15        |
| FeCoW                                    | 1M KOH      | 10                          | 191            | -                                | 16        |

**Table S3** Comparison of water splitting cell voltage of N-Ni<sub>3</sub>S<sub>2</sub>@C/NF product with various well-developed electrocatalysts in the literature

| Catalyst                                                             | Electrolyte | J<br>(mA cm <sup>-2</sup> ) | Overall<br>voltage (V) | Durability<br>(h) | Ref.      |
|----------------------------------------------------------------------|-------------|-----------------------------|------------------------|-------------------|-----------|
| N-Ni <sub>3</sub> S <sub>2</sub> @C/NF                               | 1 M KOH     | 10                          | 1.57                   | 140               | This work |
| N-Ni <sub>3</sub> S <sub>2</sub> /NF                                 | 1 M KOH     | 10                          | 1.48                   | 8                 | 1         |
| NiS microsphere                                                      | 1 M KOH     | 10                          | 1.64                   | 35                | 4         |
| NiSe nanowire                                                        | 1 M KOH     | 10                          | 1.63                   | 20                | 17        |
| Fe <sub>2</sub> Ni <sub>2</sub> N nanoarrays                         | 1 M KOH     | 10                          | 1.65                   | 10                | 5         |
| Ni@Co-Ni-P                                                           | 1 M KOH     | 100                         | 1.61                   | 528               | 18        |
| NiCo <sub>2</sub> S <sub>4</sub> nanowire                            | 1 M KOH     | 10                          | 1.63                   | 50                | 6         |
| MoS <sub>2</sub> /Ni <sub>3</sub> S <sub>2</sub><br>Heterostructures | 1 M KOH     | 10                          | 1.56                   | 10                | 19        |
| CoS-Co(OH) <sub>2</sub>                                              | 1 M KOH     | 10                          | 1.58                   | 28                | 20        |
| Ni/Ni <sub>8</sub> P <sub>3</sub>                                    | 1 M KOH     | 10                          | 1.61                   | 10                | 21        |
| NiCoP                                                                | 1 M KOH     | 10                          | 1.58                   | 12                | 22        |

## References

1. P. Chen, T. Zhou, M. Zhang, T. Yun, C. Zhong, Z. Nan, L. Zhang, C. Wu and X. Yi, *Adv. Mater.*, 2017, 29,1701584.
2. W. Zhou, X. J. Wu, X. Cao, X. Huang, C. Tan, J. Tian, H. Liu, J. Wang and H. Zhang, *Energy Environ. Sci.*, 2013, 6, 2921-2924.
3. L. L. Feng, G. Yu, Y. Wu, G. D. Li, H. Li, Y. Sun, T. Asefa, W. Chen and X. Zou, *J. Am. Chem. Soc.*, 2015, 137, 14023-14026.
4. W. Zhu, X. Yue, W. Zhang, S. Yu, Y. Zhang, J. Wang and J. Wang, *Chem. Commun.*, 2015, 52, 1486-1489.
5. M. Jiang, Y. Li, Z. Lu, X. Sun and X. Duan, *Inorg. Chem. Front.*, 2016, 3, 630-634.
6. A. Sivanantham, P. Ganesan and S. Shanmugam, *Adv. Funct. Mater.*, 2016, 26, 4660-4660.
7. S. Engmann, H. W. Ro, A. Herzing, C. R. Snyder, L. J. Richter, P. B. Geraghty and D. J. Jones, *J. Mater. Chem. A*, 2016, 4, 15511-15521.
8. C. Xiao, Y. Li, X. Lu and C. Zhao, *Adv. Funct. Mater.*, 2016, 26, 3515-3523.

9. Z. Zhang, Y. Qin, M. Dou, J. Ji and F. Wang, *Nano Energy*, 2016, **30**, 426-433.
10. J. Tian, Q. Liu, A. M. Asiri and X. Sun, *J. Am. Chem. Soc.*, 2014, **136**, 7587-7590.
11. W. Li, X. Gao, D. Xiong, F. Wei, W. G. Song, J. Xu and L. Liu, *Adv. Energy Mater.*, 2017, **7**, 1602579.
12. C. Ouyang, X. Wang, C. Wang, X. Zhang, J. Wu, Z. Ma, S. Dou and S. Wang, *Electrochim. Acta*, 2015, **174**, 297-301.
13. M. Lee, H. S. Oh, K. C. Min, J. P. Ahn, J. H. Yun and B. K. Min, *Appl. Catal. B Environ.*, 2018, **233**, 130-135.
14. Q. Yang, T. Li, Z. Lu, X. Sun and J. Liu, *Nanoscale*, 2014, **6**, 11789-11794.
15. J. Jiang, A. Zhang, L. Li and L. Ai, *J. Power Sources*, 2015, **278**, 445-451.
16. Z. Bo, X. Zheng, O. Voznyy, R. Comin, M. Bajdich, M. García-Melchor, L. Han, J. Xu, L. Min and L. Zheng, *Science*, 2016, **352**, 333-337.
17. C. Tang, N. Cheng, Z. Pu, W. Xing and X. Sun, *Angew Chem. Int. Ed. Engl.*, 2015, **54**, 9351-9355.
18. J. Zhang, H. Liu, P. Shi, Y. Li, L. Huang, W. Mai, S. Tan and X. Cai, *J. Power Sources*, 2014, **267**, 356-365.
19. J. Zhang, T. Wang, D. Pohl, B. Rellinghaus, R. Dong, S. Liu, X. Zhuang and X. Feng, *Angew. Chem.*, 2016, **55**, 6702-6707.
20. T. Yoon and K. S. Kim, *Advanced Functional Materials*, 2016, **26**, 7370-7370.
21. G. F. Chen, T. Y. Ma, Z. Q. Liu, N. Li, Y. Z. Su, K. Davey and S. Z. Qiao, *Adv. Funct. Mater.*, 2016, **26**, 3314-3323.
22. H. Liang, A. N. Gandi, D. H. Anjum, X. Wang, U. Schwingenschlägl and H. N. Alshareef, *Nano Lett.*, 2016, **16**, 7718-7725.
